# Supplementary material for: Stochastic deep collocation method based on neural architecture search and transfer learning for heterogeneous porous media
Source: Springer Nature journal article supplement (doi:10.1007/s00366-021-01586-2), 2022-01-18
Supplement: MOESM1 [file 20046542]

\documentclass[10pt]{article}
\usepackage[margin=1in]{geometry}
\usepackage{amsmath,amsthm,amssymb}
\usepackage{graphicx}
\usepackage{float}
\usepackage{subcaption}
\usepackage{xr-hyper}
\usepackage{hyperref}

\renewcommand\thefigure{S\arabic{figure}} % modify \thefigure, *not* \figurename

\makeatother

\title{Supplementary materials}
\date{}
\begin{document}
\maketitle
\section{Two dimensional groundwater flow with both correlations}

\begin{figure}[H]
	\captionsetup{width=0.85\columnwidth}
	\centering
	\begin{subfigure}[b]{6.0cm}
		\centering\includegraphics[height=6cm,width=6.0cm]{2D_Exp_exact.eps}   
		\caption{}
	\end{subfigure}%
	\hspace{0.05cm}
	\begin{subfigure}[b]{6.0cm}
		\centering\includegraphics[height=6cm,width=6.0cm]{2D_Exp_pred.eps}   
		\caption{}
	\end{subfigure}% 
	\caption{Two dimensional hydraulic head when $\sigma^2=0.1$, $N=2000$ with exponential correlation $\left(a\right)$ exact solution and $\left(b\right)$ predict solution}
	\label{fig:2Dtestexp}
\end{figure}

\begin{figure}[H]
	\captionsetup{width=0.85\columnwidth}
	\centering
	\begin{subfigure}[b]{6.0cm}
		\centering\includegraphics[height=6cm,width=6.0cm]{2D_Exp_v_exact.eps}   
		\caption{}
	\end{subfigure}%
	\hspace{0.5cm}
	\begin{subfigure}[b]{6.0cm}
		\centering\includegraphics[height=6cm,width=6.0cm]{2D_Exp_v_pred.eps}   
		\caption{}
	\end{subfigure}% 
	\caption{Two dimensional velocity when $\sigma^2=0.1$, $N=2000$ with exponential correlation $\left(a\right)$ exact solution and $\left(b\right)$ predict solution}
	\label{fig:2Dtestexpv}
\end{figure}

\begin{figure}[H]
	\captionsetup{width=0.85\columnwidth}
	\centering
	\begin{subfigure}[b]{6.0cm}
		\centering\includegraphics[height=6cm,width=6.0cm]{2D_Gauss_exact.eps}   
		\caption{}
	\end{subfigure}%
	\hspace{0.5cm}
	\begin{subfigure}[b]{6.0cm}
		\centering\includegraphics[height=6cm,width=6.0cm]{2D_Gauss_pred.eps}   
		\caption{}
	\end{subfigure}% 
	\caption{Two dimensional hydraulic head when $\sigma^2=0.1$, $N=2000$ with Gaussian correlation $\left(a\right)$ exact solution and $\left(b\right)$ predict solution}
	\label{fig:2Dtestgauss}
\end{figure}

\begin{figure}[H]
	\captionsetup{width=0.85\columnwidth}
	\centering
	\begin{subfigure}[b]{6.0cm}
		\centering\includegraphics[height=6cm,width=6.0cm]{2D_Gauss_v_exact.eps}   
		\caption{}
	\end{subfigure}%
	\hspace{0.5cm}
	\begin{subfigure}[b]{6.0cm}
		\centering\includegraphics[height=6cm,width=6.0cm]{2D_Gauss_v_pred.eps}   
		\caption{}
	\end{subfigure}% 
	\caption{Two dimensional velocity when $\sigma^2=0.1$, $N=2000$ with Gaussian correlation $\left(a\right)$ exact solution and $\left(b\right)$ predict solution}
	\label{fig:2Dtestgaussv}
\end{figure}

\section{Three dimensional groundwater flow with both correlations}
\begin{figure}[H]
	\captionsetup{width=0.85\columnwidth}
	\centering
	\begin{subfigure}[b]{6.0cm}
		\centering\includegraphics[height=6cm,width=6.0cm]{3D_Exp_exact.eps}   
		\caption{}
	\end{subfigure}%
	\hspace{0.5cm}
	\begin{subfigure}[b]{6.0cm}
		\centering\includegraphics[height=6cm,width=6.0cm]{3D_Exp_pred.eps}   
		\caption{}
	\end{subfigure}% 
	\caption{Three dimensional hydraulic head when $\sigma^2=0.1$, $N=2000$ with exponential correlation $\left(a\right)$ exact solution and $\left(b\right)$ predict solution}
	\label{fig:3Dtestexp}
\end{figure}

\begin{figure}[H]
	\captionsetup{width=0.85\columnwidth}
	\centering
	\begin{subfigure}[b]{6.0cm}
		\centering\includegraphics[height=6cm,width=6.0cm]{3D_Exp_v_exact.eps}   
		\caption{}
	\end{subfigure}%
	\hspace{0.5cm}
	\begin{subfigure}[b]{6.0cm}
		\centering\includegraphics[height=6cm,width=6.0cm]{3D_Exp_v_pred.eps}   
		\caption{}
	\end{subfigure}% 
	\caption{Three dimensional velocity when $\sigma^2=0.1$, $N=2000$ with exponential correlation $\left(a\right)$ exact solution and $\left(b\right)$ predict solution}
	\label{fig:3Dtestexpv}
\end{figure}

\begin{figure}[H]
	\captionsetup{width=0.85\columnwidth}
	\centering
	\begin{subfigure}[b]{6.0cm}
		\centering\includegraphics[height=6cm,width=6.0cm]{3D_Gauss_exact.eps}   
		\caption{}
	\end{subfigure}%
	\hspace{0.5cm}
	\begin{subfigure}[b]{6.0cm}
		\centering\includegraphics[height=6cm,width=6.0cm]{3D_Gauss_pred.eps}   
		\caption{}
	\end{subfigure}% 
	\caption{Three dimensional hydraulic head when $\sigma^2=0.1$, $N=2000$ with Gaussian correlation $\left(a\right)$ exact solution and $\left(b\right)$ predict solution}
	\label{fig:3Dtestgauss}
\end{figure}

\begin{figure}[H]
	\captionsetup{width=0.85\columnwidth}
	\centering
	\begin{subfigure}[b]{6.0cm}
		\centering\includegraphics[height=6cm,width=6.0cm]{3D_Gauss_v_exact.eps}   
		\caption{}
	\end{subfigure}%
	\hspace{0.5cm}
	\begin{subfigure}[b]{6.0cm}
		\centering\includegraphics[height=6cm,width=6.0cm]{3D_Gauss_v_pred.eps}   
		\caption{}
	\end{subfigure}% 
	\caption{Three dimensional velocity when $\sigma^2=0.1$, $N=2000$ with Gaussian correlation $\left(a\right)$ exact solution and $\left(b\right)$ predict solution}
	\label{fig:3Dtestgaussv}
\end{figure}


\end{document}
